# Supplementary material for: Evaluation of an OCT-AI–Based Telemedicine Platform for Retinal Disease Screening and Referral in a Primary Care Setting
Source: PubMed Central journal article supplement — Transl Vis Sci Technol. 2022 Mar 7;11(3):4. doi: 10.1167/tvst.11.3.4 (PMC8914565; doi:10.1167/tvst.11.3.4), 2022-03-07
Supplement: tvst-11-3-4_s001.pdf [file tvst-11-3-4_s001.pdf]

A

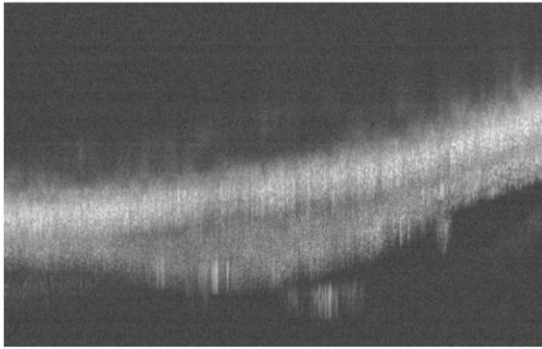

OD

Poor imaging quality that require rescan

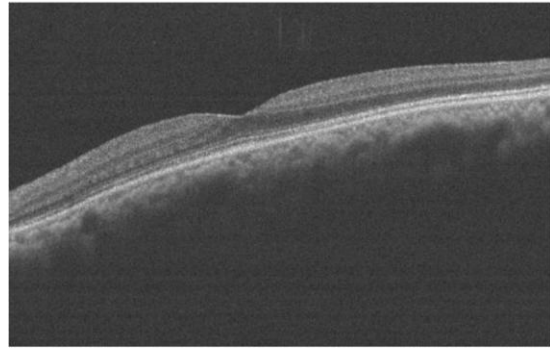

OS

Normal No pathologies detected in macular region

B

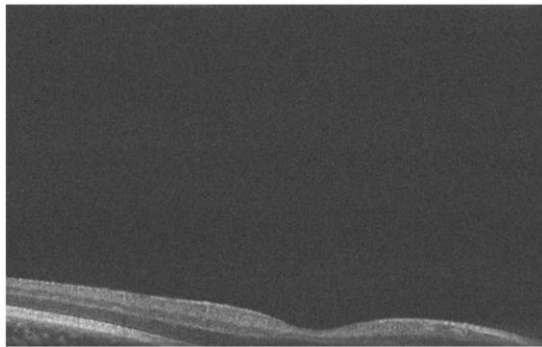

OD

Poor imaging quality that require rescan

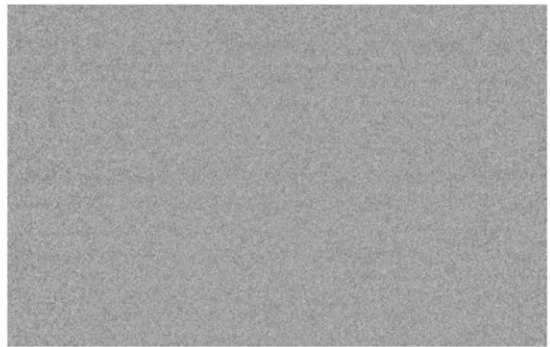

OS

Poor imaging quality that require rescan

**Figure Supplement 1.** Examples of poor imaging quality. (A) Poor quality OCT images of the right eye, and (B) the images of both eyes are poor quality.
